# Supplementary material for: Iodobismuthates with N-alkyl- or N,N′-dialkyl-4,4′-bipyridinium: syntheses, structures and dielectric properties
Source: Royal Society of Chemistry journal article supplement (doi:10.1039/c0cp02431g), 2011-01-01
Supplement: c0cp02431g.pdf [file c0cp02431g.pdf]

## Electronic Supporting Information

### **Iodobismuthates with *N*-alkyl- or *N,N'*-dialkyl-4,4'-bipyridinium: syntheses, structures and dielectric properties**

Yang Chen,<sup>a</sup> Zhou Yang,<sup>a</sup> Xin-Yi Wu,<sup>a</sup> Chun-Yan Ni,<sup>a</sup> Zhi-Gang Ren,<sup>a</sup> Hui-Fang Wang,<sup>a</sup> and Jian-Ping Lang<sup>\*a,b</sup>

<sup>a</sup> *College of Chemistry, Chemical Engineering and Materials Science, Soochow University, Suzhou 215123, Jiangsu, P. R. China*

<sup>b</sup> *State Key Laboratory of Coordination Chemistry, Nanjing University, Nanjing 210093, P. R. China.*

## Table of Contents

|                                                                                                         |    |
|---------------------------------------------------------------------------------------------------------|----|
| <b>Fig. S1</b> 2D $[\text{Bi}_2\text{I}_6(\mu\text{-I})_2(\text{MQ})_2]$ -based layer in <b>1</b> ..... | S3 |
| <b>Fig. S2</b> Perspective view of the asymmetric unit of <b>2</b> with 50% thermal ellipsoids.....     | S3 |
| <b>Fig. S3</b> 3D packing diagram of <b>2</b> .....                                                     | S3 |
| <b>Fig. S4</b> 2D packing diagram of <b>4</b> extending along <i>ac</i> plane.....                      | S4 |

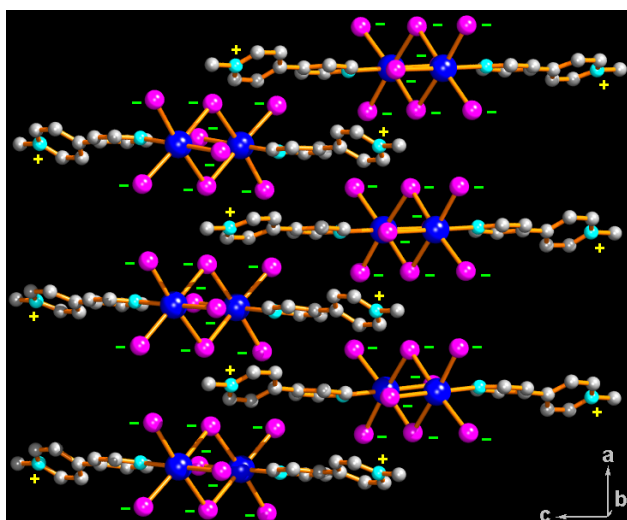

**Fig. S1** 2D  $[\text{Bi}_2\text{I}_6(\mu\text{-I})_2(\text{MQ})_2]$ -based layer in **1**. Hydrogen atoms are omitted for clarity. The “+” and “-” represent the positive charge and negative charge center, respectively. Atom color codes: C, grey; H, white; N, cyan; Bi, blue; I, pink (the same hereinafter).

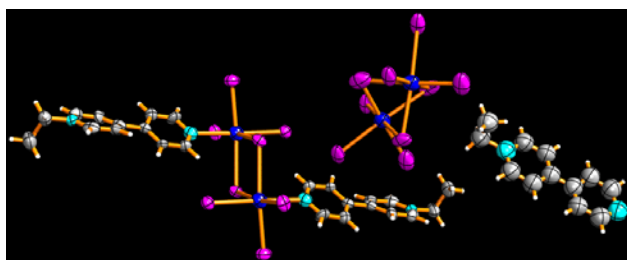

**Fig. S2** Perspective view of the asymmetric unit of **2** with 50% thermal ellipsoids.

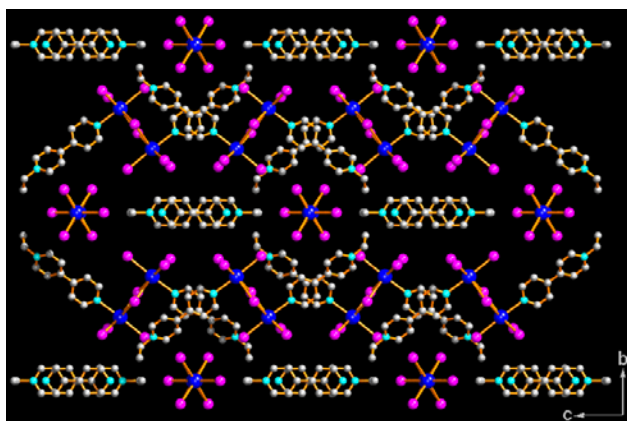

**Fig. S3** 3D packing diagram of **2**, which is similar with that of **1**. H atoms are omitted for clarity.

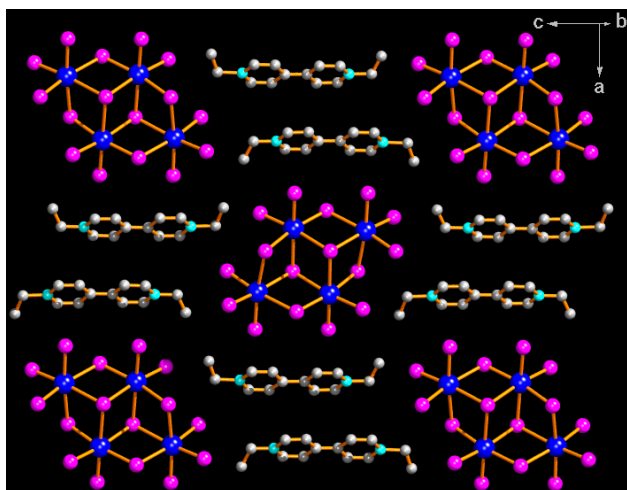

**Fig. S4** 2D packing diagram of **4** extending along *ac* plane. H atoms are omitted for clarity.
